# Supplementary material for: Modulation of muscle redox and protein aggregation rescues lethality caused by mutant lamins
Source: PubMed Central journal article supplement — Redox Biol. 2021 Nov 25;48:102196. doi: 10.1016/j.redox.2021.102196 (PMC8646998; doi:10.1016/j.redox.2021.102196), 2021-11-25

# Supplemental 1

**A**

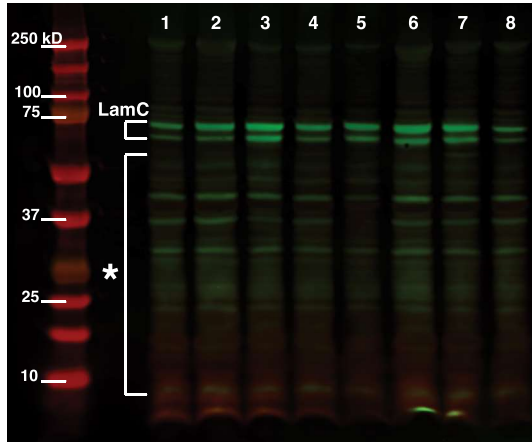

**B**

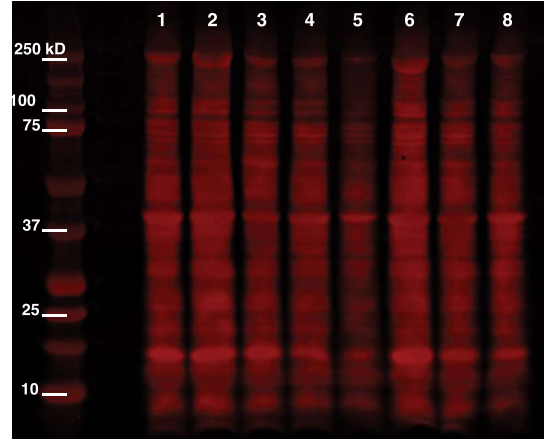

**C**

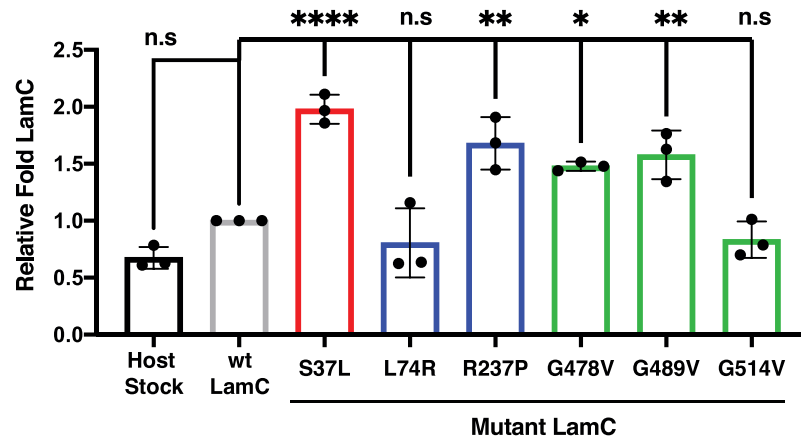

**Supplemental 2**

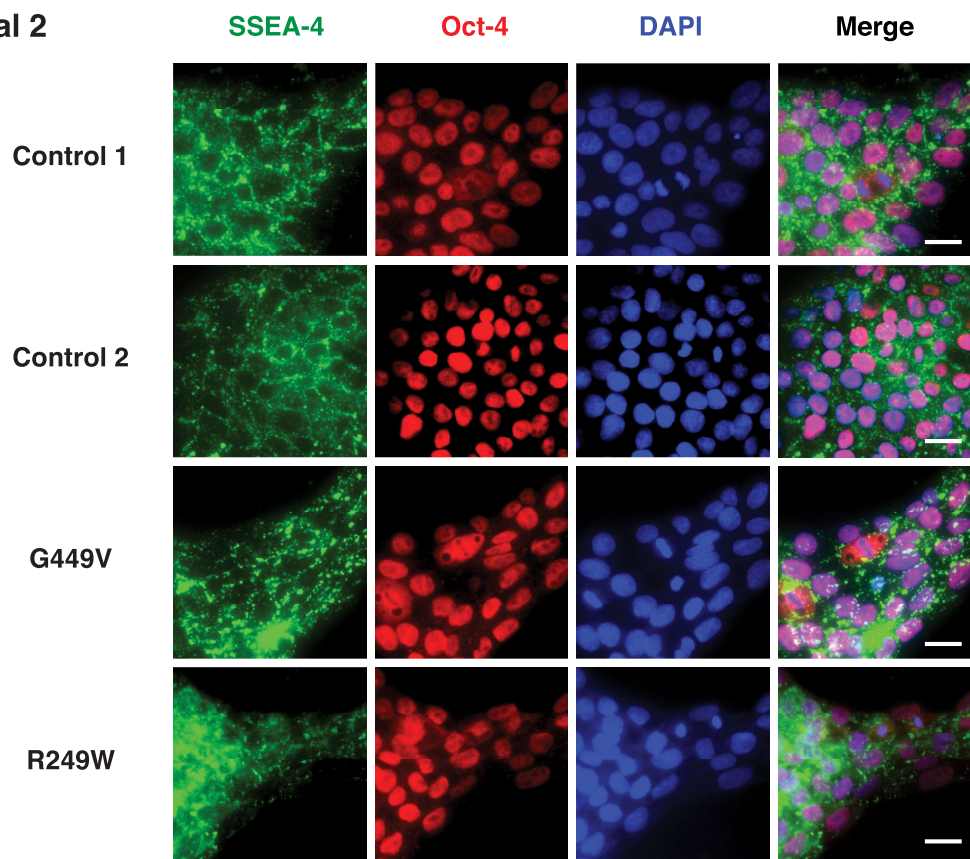

Supplemental 3

Control 1

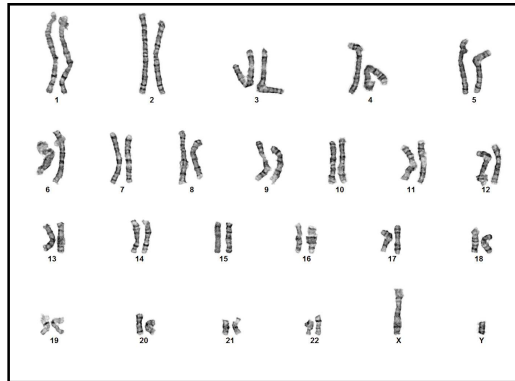

Control 2

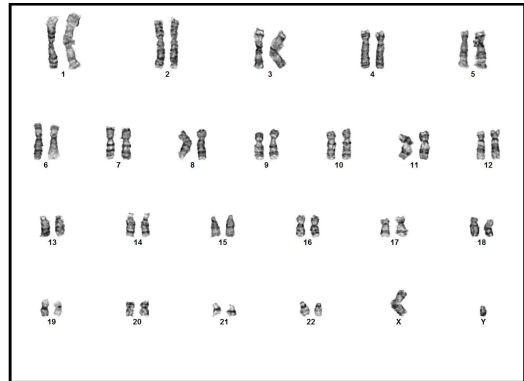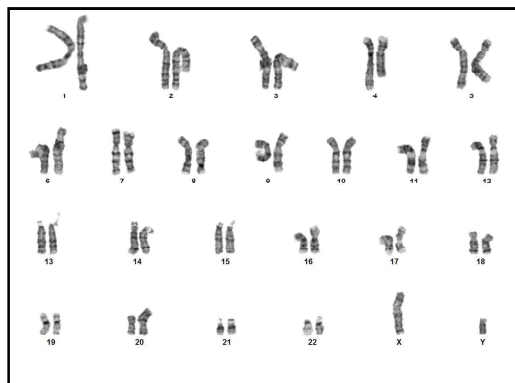

G449V

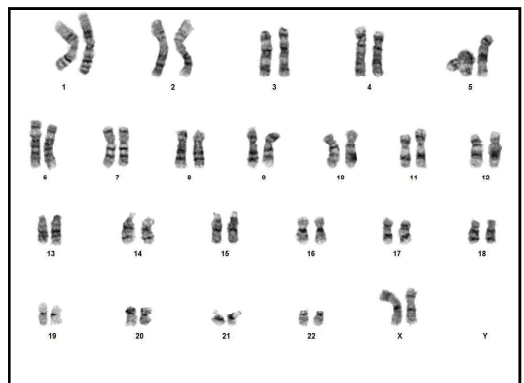

R249W

## Supplemental 4

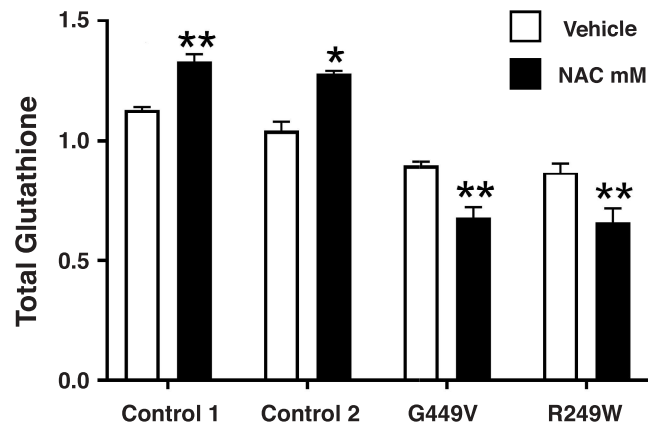

Supplemental 5

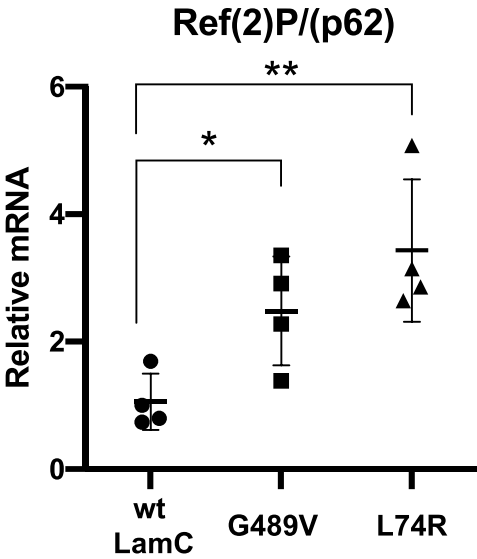

Supplemental 6

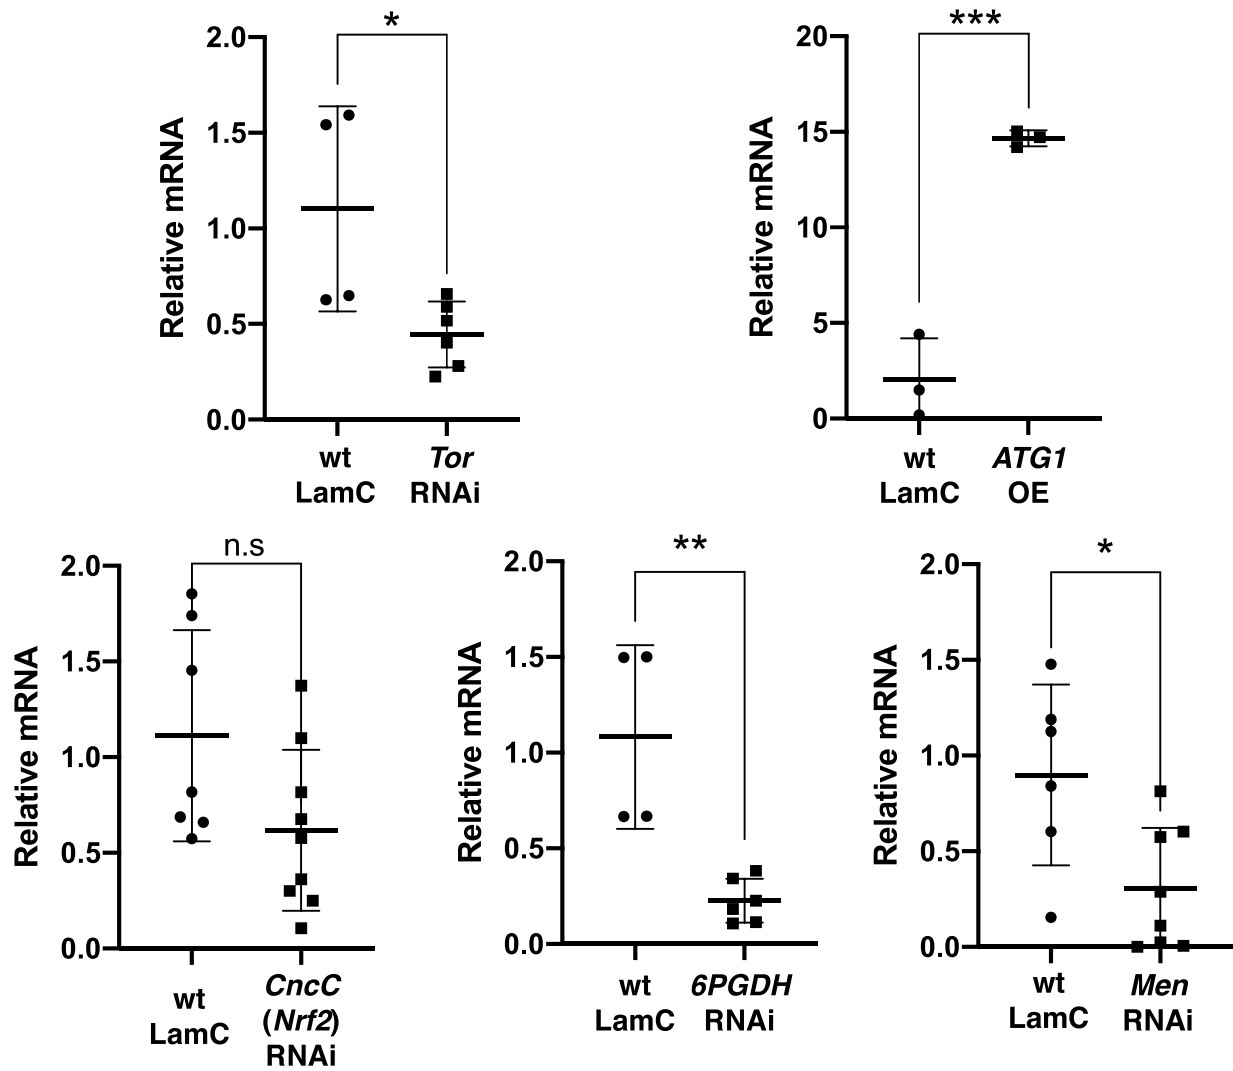

Supplement: mmc1.pdf [file mmc1.pdf]
